# Supplementary material
Source: PubMed Central journal article supplement (PMC2837592)
Supplement: supp_72_23_1989__1.pdf [file supp_72_23_1989__1.pdf]

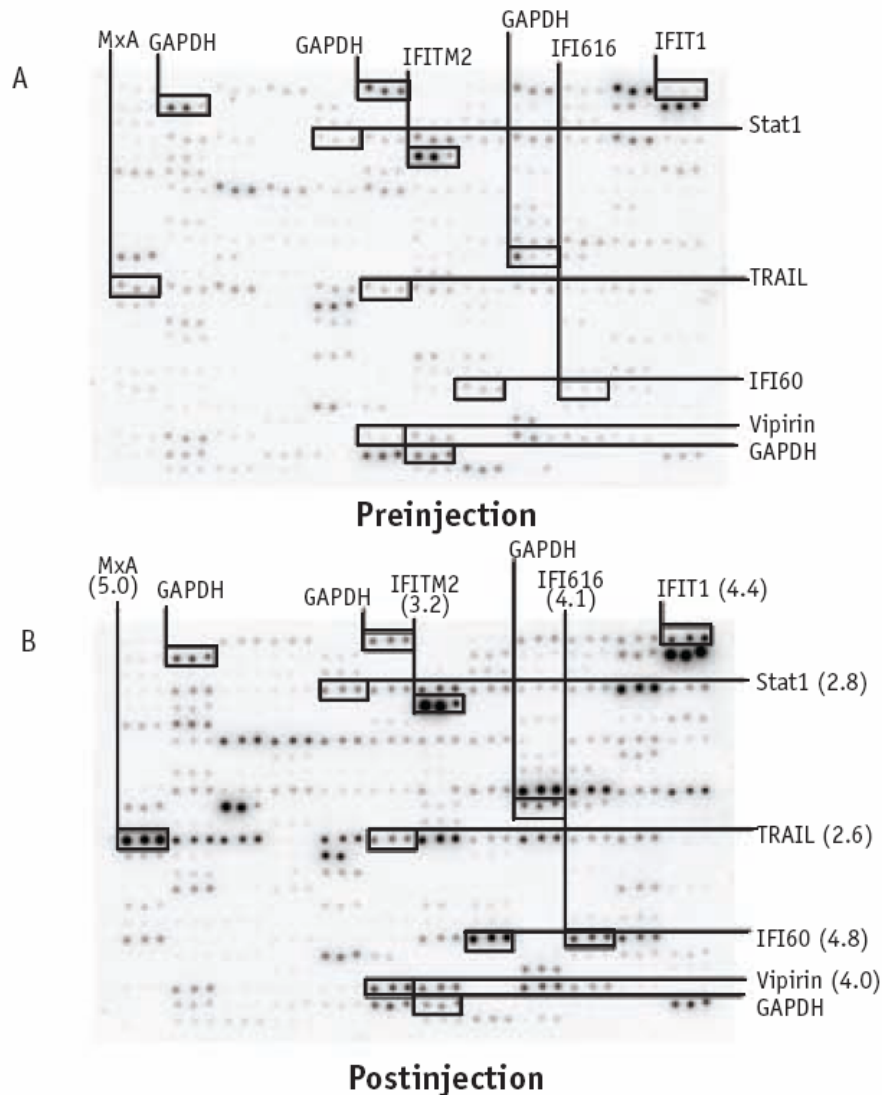

**Figure E-1 Interferon-stimulated gene (ISG) induction in a statin-treated patient with relapsing-remitting multiple sclerosis after the initial dose of intramuscular interferon beta-1a (IFN $\beta$ -1a)**

Blood was obtained 12 hours before (A) and after (B) an IFN $\beta$ -1a injection and subjected to a macroarray assay. The figure shows a digitized image of the macroarray assay. RNA was isolated from whole blood, reverse-transcribed using a radiolabel, and hybridized to a nylon membrane containing triplicate spots of DNA from selected ISGs. After wash, all membranes were exposed on the StormImager (Molecular Dynamics, Sunnyvale, CA, USA) screen for 48 hours and the radioactivity bound on the membrane was quantitated. Eight representative ISGs (MxA, IFIT1, IFITM2, IFI616, Stat1, TRAIL, IFI60, Vipirin) are shown along with their induction ratios (in parentheses in B; calculated as described in Materials and Methods). The housekeeping gene glyceraldehyde-3-phosphate dehydrogenase (GAPDH) is also highlighted.

Contact: [rudickr@ccf.org](mailto:rudickr@ccf.org)
