# Supplementary material
Source: PubMed Central journal article supplement (PMC2837592)
Supplement: supp_72_23_1989__2.pdf [file supp_72_23_1989__2.pdf]

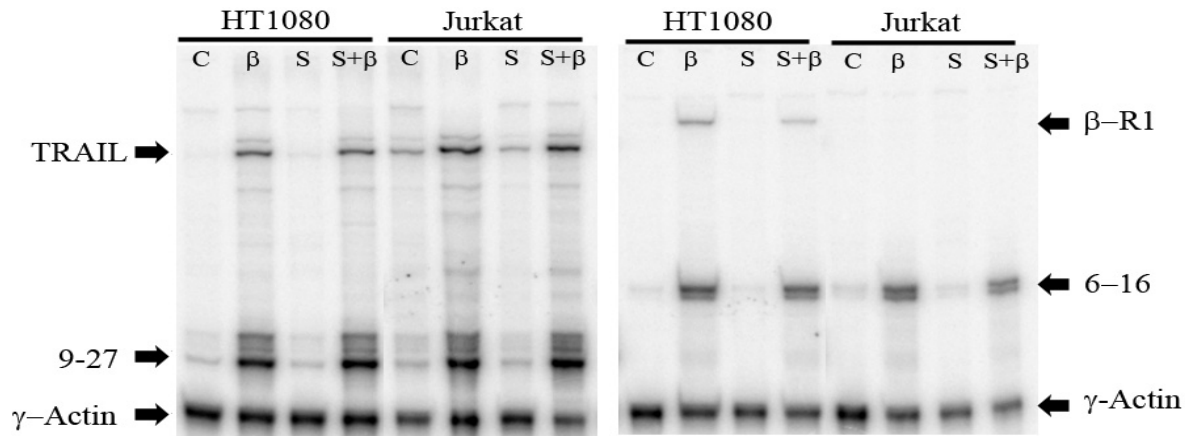

**Figure E-2 Mevastatin does not alter interferon beta (IFN $\beta$ )-induced gene induction in statin-exposed cells**

The figure represents an autoradiogram obtained from one representative ribonuclease protection assay experiment using 10 mg of the total RNA from the following HT1080 and Jurkat cells: untreated (C), treated with 1000 U/mL of IFN $\beta$  for 6 hours (b), treated with 10 mM mevastatin for 24 hours (S), and pretreated with 10 mM mevastatin for 24 hours followed by treatment with 1000 U/mL of IFN $\beta$  for 6 hours (S+b). The total RNA from these cells was hybridized with b-R1, TRAIL, 6-16, 9-27, and g-actin probes. The protected RNA fragments were separated on a 6% polyacrylamide gel and visualized by autoradiography.

Contact: rudickr@ccf.org
