# Supplementary material
Source: PubMed Central journal article supplement (PMC2837592)
Supplement: supp_72_23_1989__3.pdf [file supp_72_23_1989__3.pdf]

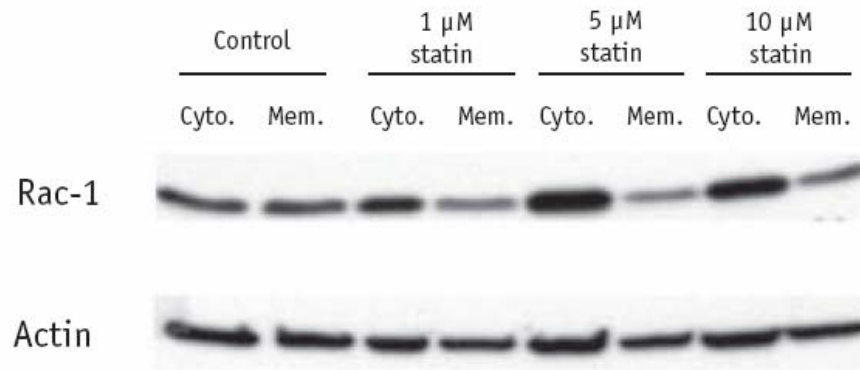

**Figure E-3 Mevastatin inhibits association of Rac-1 with cell membranes**

HT1080 cells were treated with different doses of a statin, as indicated in the figure, and cytoplasmic and membrane fractions were isolated. Cell lysates were resolved by the sodium dodecyl sulfate polyacrylamide gel electrophoresis, transferred to a polyvinylidene difluoride membrane, and probed with an anti-Rac-1 antibody. Immunoreactivity was visualized using the ECL Western blotting system (Amersham Biosciences). Blots were stripped and probed with an anti- $\beta$ -actin antibody to normalize for protein loading.

Contact: [rudickr@ccf.org](mailto:rudickr@ccf.org)
